# Supplementary material
Source: MDPI journal article supplement (https://www.mdpi.com/2075-1729/14/1/161)
Supplement: s1 [file s1]

Archive with 1 entries (1 files):
- life-2770286-supplementary.pdf
